# Supplementary material for: Reconsidering the Tolerable Upper Levels of Zinc Intake among Infants and Young Children: A Systematic Review of the Available Evidence
Source: MDPI journal article supplement (doi:10.3390/nu14091938), 2022-05-05
Supplement: s1 [file s1]

# Reconsidering the tolerable upper levels of zinc intake among infants and young children: A systematic review of the available evidence

Sara Wuehler<sup>1\*</sup>, Daniel Lopez de Romaña<sup>1</sup>, Demewoz Haile<sup>2,3</sup>, Christine M. McDonald<sup>4,5</sup> and Kenneth H. Brown<sup>2\*</sup>

<sup>1</sup> Nutrition International, Canada

<sup>2</sup> Department of Nutrition and Institute for Global Nutrition, University of California Davis, CA USA

<sup>3</sup> Institute for Health Metrics and Evaluation, University of Washington, Seattle, Washington USA

<sup>4</sup> Department of Pediatrics, University of California, San Francisco, CA. USA

<sup>5</sup> International Zinc Nutrition Consultative Group, Oakland, CA

\* Correspondence: S.W.\* swuehler@nutritionintl.org; D.LdR. dlopezderomana@nutritionintl.org; D.H. dewolde@ucdavis.edu; C.M. Christine.Mcdonald@ucsf.edu; K.B.\* khbrown@ucdavis.edu

## Supplementary Materials

### Supplemental Tables

**Table S1. Studies and comparisons with reported serum or plasma copper outcomes in response to additional zinc supplementation or fortification, by author.**

| Study         | Year | Country    | Sample size analyzed | Characteristics of subjects  | Initial age | Duration, m | Schedule | Intervention (All controls are same without the added zinc) | Form of zinc | Dose, mg <sup>1</sup>                | Actual dose, mg/d <sup>1</sup>       | Effect of zinc§ |
|---------------|------|------------|----------------------|------------------------------|-------------|-------------|----------|-------------------------------------------------------------|--------------|--------------------------------------|--------------------------------------|-----------------|
| Baqui [1]     | 2005 | Bangladesh | 80                   | Healthy infants              | 6 m         | 6           | Weekly   | Zn + B <sub>2</sub> supplement                              | Acetate      | 20                                   | 2.9                                  | ±               |
| Baqui [1]     | 2005 | Bangladesh | 82                   | Healthy infants              | 6 m         | 6           | Weekly   | Zn + Fe + B <sub>2</sub> supplement                         | Acetate      | 20                                   | 2.9                                  | ±               |
| Bertinato [2] | 2013 | Canada     | 20                   | Healthy children, male       | 6-8 y       | 4           | Daily    | Zn supplement                                               | Gluconate    | 5                                    | 5                                    | ±               |
| Bertinato [2] | 2013 | Canada     | 19                   | Healthy children, male       | 6-8 y       | 4           | Daily    | Zn supplement                                               | Gluconate    | 10                                   | 10                                   | ±               |
| Bertinato [2] | 2013 | Canada     | 18                   | Healthy children, male       | 6-8 y       | 4           | Daily    | Zn supplement                                               | Gluconate    | 15                                   | 15                                   | ±               |
| Bhandari [3]  | 2002 | India      | 930                  | Healthy infants and children | 6-30 m      | 4           | Daily    | Zn supplement                                               | Gluconate    | 10 for < 12 m-old & 20 for ≥12 m-old | 10 for < 12 m-old & 20 for ≥12 m-old | ↓               |
| Brooks [4]    | 2005 | Bangladesh | 636                  | Healthy infants              | 1-12 m      | 10          | Weekly   | Zn supplement                                               | Acetate      | 70                                   | 10                                   | [±]*            |

|                   |      |           |     |                                                   |         |                    |       |                                                                |                      |                                                  |                                      |        |
|-------------------|------|-----------|-----|---------------------------------------------------|---------|--------------------|-------|----------------------------------------------------------------|----------------------|--------------------------------------------------|--------------------------------------|--------|
| Brown [5]         | 2007 | Peru      | 144 | Healthy infants                                   | 6-8 m   | 6                  | Daily | Zn + other MN supplement, + Fe fortified food                  | Sulfate              | 3                                                | 2.3                                  | ±      |
| Brown [5]         | 2007 | Peru      | 147 | Healthy infants                                   | 6-8 m   | 6                  | Daily | Zn + Fe fortified complementary food + MN supplement (no zinc) | Sulfate              | 3                                                | 3.3                                  | ↓ [±]* |
| Caulfield [6]     | 2013 | Peru      | 159 | Healthy infants                                   | 4-6 m   | 18                 | Daily | Zn + Fe + Cu supplement                                        | Sulfate              | 10                                               | 10                                   | ±      |
| Hambidge [7]      | 1979 | USA       | 58  | Healthy children                                  | 33-90 m | 9                  | Daily | Zn fortified breakfast cereal (control, no fortificant)        | Oxide                | 3 (difference from control; 9.3)<br>Control: 6.3 | »3                                   | ↓ [±]* |
| Heinig [8]        | 2006 | USA       | 19  | Healthy infants                                   | 4 m     | 6                  | Daily | Zn supplement                                                  | Gluconate or Sulfate | 5                                                | 5                                    | ↓      |
| Lind [9]          | 2003 | Indonesia | 277 | Healthy infants                                   | 6 m     | 6                  | Daily | Zn supplement                                                  | Sulfate              | 10                                               | 10                                   | ±      |
| Lind [9]          | 2003 | Indonesia | 272 | Healthy infants                                   | 6 m     | 6                  | Daily | Zn + Fe supplement                                             | Sulfate              | 10                                               | 10                                   | ±      |
| Radhakrishna [10] | 2013 | India     | 68  | Healthy infants                                   | 4 m     | 14 (12 with suppl) | Daily | Intervention Zn + B2 supplement                                | Sulfate              | 5                                                | 5                                    | ±      |
| Rosado [11]       | 2006 | Mexico    | 187 | Healthy children with environmental lead exposure | 6-7 y   | 6                  | 5d/wk | Zn supplement                                                  | Oxide                | 30                                               | 21.4                                 | ±      |
| Rosado [11]       | 2006 | Mexico    | 198 | Healthy children with environmental lead exposure | 6-7 y   | 6                  | 5d/wk | Fe + Zn supplement                                             | Oxide                | 30                                               | 21.4                                 | ±      |
| Ruz [12]          | 1997 | Chile     | 69  | Healthy children                                  | 27-50 m | 6 biochemical      | Daily | Zn supplement                                                  | Sulfate              | 10                                               | 10                                   | ±      |
| Sazawal [13]      | 2004 | India     | 110 | Healthy infants                                   | 5-12 m  | 4                  | Daily | Zn supplement + multi-vitamins                                 | Gluconate            | 10                                               | 10                                   | ±      |
| Tielsch [14]      | 2007 | Nepal     | 197 | Healthy infants and children                      | 1-35 m  | 12                 | Daily | Zn supplement                                                  | Sulfate              | 5 for 1-11 m-old, 10 for 12-35 m-old             | 5 for 1-11 m-old, 10 for 12-35 m-old | ±      |

|                |      |         |     |                       |         |    |       |                           |         |                                        |    |   |
|----------------|------|---------|-----|-----------------------|---------|----|-------|---------------------------|---------|----------------------------------------|----|---|
| Walravens [15] | 1976 | USA     | 68  | Healthy infants       | 4-6 d   | 6  | Daily | Zn + Fe fortified formula | Sulfate | 4 more than (1.8)<br>Control: 1.8      | ~4 | ↑ |
| Walravens [16] | 1983 | USA     | 40  | Zn deficient children | 2-6 y   | 12 | Daily | Zn supplement             | Sulfate | 10 (average 4.2/d based on compliance) | 10 | ± |
| Wuehler [17]   | 2008 | Ecuador | 110 | Healthy children      | 12-30 m | 6  | Daily | Zn supplement             | Sulfate | 10                                     | 10 | ± |

\*In brackets is the effect as reported by the original study. ↑ or ↓ indicates the final concentration is higher or lower, respectively, in the zinc intervention group compared to the non-zinc comparison; ± indicates no reported difference between zinc and no-zinc interventions.

<sup>1</sup> All control groups received the same as the intervention except the dose of zinc listed

**Table S2. Studies and comparisons with reported serum or plasma ceruloplasmin outcomes in response to additional zinc supplementation or fortification, by author.**

| Study         | Year of publication | Country | Sample size analyzed | Characteristics of subjects | Initial age | Duration, m | Schedule | Intervention (All controls are same without the added zinc) | Form of zinc | Dose <sup>1</sup> , mg | Actual dose <sup>1</sup> , mg/d | Effect of zinc§ |
|---------------|---------------------|---------|----------------------|-----------------------------|-------------|-------------|----------|-------------------------------------------------------------|--------------|------------------------|---------------------------------|-----------------|
| Bertinato [2] | 2013                | Canada  | 20                   | Healthy children, male      | 6-8 y       | 4           | Daily    | Zn supplement                                               | Gluconate    | 5                      | 5                               | ±               |
| Bertinato [2] | 2013                | Canada  | 19                   | Healthy children, male      | 6-8 y       | 4           | Daily    | Zn supplement                                               | Gluconate    | 10                     | 10                              | ±               |
| Bertinato [2] | 2013                | Canada  | 18                   | Healthy children, male      | 6-8 y       | 4           | Daily    | Zn supplement                                               | Gluconate    | 15                     | 15                              | ±               |
| De Brito [18] | 2014                | Brazil  | 30                   | Healthy children            | 8-9 y       | 3           | Daily    | Zn added to milk or juice                                   | Sulfate      | 10                     | 10                              | ↓ [±]*          |
| Wuehler [17]  | 2008                | Ecuador | 110                  | Healthy children            | 12-30 m     | 6           | Daily    | Zn supplement                                               | Sulfate      | 10                     | 10                              | ±               |

\*In brackets is the effect as reported by the original study. ↑ or ↓ indicates the final concentration is higher or lower, respectively, in the zinc intervention group compared to the non-zinc comparison; ± indicates no reported difference between zinc and no-zinc interventions.

<sup>1</sup> All control groups received the same as the intervention except the dose of zinc listed

**Table S3. Studies and comparisons with reported erythrocyte superoxide dismutase (ESOD) outcomes in response to additional zinc supplementation or fortification, by author.**

| Study         | Year | Country | Sample size analyzed | Characteristics of subjects  | Initial age | Duration, m | Schedule  | Intervention (All controls are same without the added zinc) | Form of zinc           | Dose <sup>1</sup> , mg | Actual dose <sup>1</sup> , mg/d | Effect of zinc§ |
|---------------|------|---------|----------------------|------------------------------|-------------|-------------|-----------|-------------------------------------------------------------|------------------------|------------------------|---------------------------------|-----------------|
| Bates [19]    | 1993 | Gambia  | 106                  | Healthy infants and children | 6-28m       | 2           | Bi-Weekly | Zn supplement                                               | Acetate then gluconate | 70                     | 20                              | ±               |
| Bertinato [2] | 2013 | Canada  | 18                   | Healthy children, male       | 6-8 y       | 4           | Daily     | Zn supplement                                               | Gluconate              | 15                     | 15                              | ±               |
| Bertinato [2] | 2013 | Canada  | 20                   | Healthy children, male       | 6-8 y       | 4           | Daily     | Zn supplement                                               | Gluconate              | 5                      | 5                               | ±               |
| Bertinato [2] | 2013 | Canada  | 19                   | Healthy children, male       | 6-8 y       | 4           | Daily     | Zn supplement                                               | Gluconate              | 10                     | 10                              | ↓ [±]*          |
| Heinig [8]    | 2006 | USA     | 19                   | Healthy infants              | 4 m         | 6           | Daily     | Zn supplement                                               | Gluconate or Sulfate   | 5                      | 5                               | ±               |
| Wuehler [17]  | 2008 | Ecuador | 110                  | Healthy children             | 12-30 m     | 6           | Daily     | Zn supplement                                               | Sulfate                | 10                     | 10                              | ±               |

\*In brackets is the effect as reported by the original study. ↑ or ↓ indicates the final concentration is higher or lower, respectively, in the zinc intervention group compared to the non-zinc comparison; ± indicates no reported difference between zinc and no-zinc interventions.

<sup>1</sup> All control groups received the same as the intervention except the dose of zinc listed

**Table S4. Studies and comparisons with reported serum or plasma ferritin outcomes in response to additional zinc supplementation or fortification, by author.**

| Study                          | Year | Country      | Sample size analyzed | Characteristics of subjects                           | Initial age | Duration, m | Schedule                     | Intervention (All controls are same without the added zinc) | Form of zinc           | Dose <sup>1</sup> , mg           | Actual dose <sup>1</sup> , mg/d  | Effect of zinc§ |
|--------------------------------|------|--------------|----------------------|-------------------------------------------------------|-------------|-------------|------------------------------|-------------------------------------------------------------|------------------------|----------------------------------|----------------------------------|-----------------|
| Abdollahi [20]                 | 2019 | Iran         | 308                  | Healthy infants                                       | 6-24 m      | 6           | Daily                        | Zn supplement (program provides Fe)                         | Sulfate                | 5                                | 5                                | ±               |
| Alarcon [21]                   | 2004 | Peru         | 213                  | Anemic infants and children (70-100, moderate anemia) | 6-35m       | 4.1 (18wks) | 6d/wk                        | Fe + Zn supplement                                          | Sulfate                | 7.6                              | 6.5                              | ↑               |
| Baqui [1]                      | 2005 | Bangladesh   | 77                   | Healthy infants                                       | 6 m         | 6           | Weekly                       | Zn+ B <sub>2</sub> supplement                               | Acetate                | 20                               | 2.9                              | ±               |
| Baqui [1]                      | 2005 | Bangladesh   | 79                   | Healthy infants                                       | 6 m         | 6           | Weekly                       | Zn + Fe + B <sub>2</sub> supplement                         | Acetate                | 20                               | 2.9                              | ±               |
| Bates [19]                     | 1993 | Gambia       | 85                   | Healthy infants and children                          | 6-28m       | 2           | Bi-Weekly                    | Zn supplement                                               | Acetate then gluconate | 70                               | 20                               | ±               |
| Becquey [22] data from authors | 2016 | Burkina Faso | 169                  | Healthy infants and children                          | 6-27 m      | 11          | IPZS 10 d every 16 wk (IPZS) | Zn supplement                                               | Sulfate                | 7                                | 0.9                              | ↓ [±]*          |
| Becquey [22] data from authors | 2016 | Burkina Faso | 165                  | Healthy infants and children                          | 6-27 m      | 11          | DPZS Daily (DPZS)            | Zn supplement                                               | Sulfate                | 7                                | 7                                | ±               |
| Berger [23]                    | 2006 | Vietnam      | 249                  | Healthy infants                                       | 4-7 m       | 6           | Daily                        | Zn supplement                                               | Sulfate                | 10                               | 10                               | ±               |
| Berger [23]                    | 2006 | Vietnam      | 327                  | Healthy infants                                       | 4-7 m       | 6           | Daily                        | Zn + Fe supplement                                          | Sulfate                | 10                               | 10                               | ±               |
| Brown [5]                      | 2007 | Peru         | 144                  | Healthy infants                                       | 6-8 m       | 6           | Daily                        | Zn supplement + Fe fortified porridge                       | Sulfate                | 3                                | 2.3                              | ±               |
| Brown [5]                      | 2007 | Peru         | 147                  | Healthy infants                                       | 6-8 m       | 6           | Daily                        | Zn + Fe fortified complementary food                        | Sulfate                | 3                                | 3.3                              | ±               |
| Carter [24]                    | 2018 | Tanzania     | 302                  | Healthy infants                                       | 5-7 wk      | 19-21 wks   | Daily                        | Zn supplement                                               | Sulfate                | 5 until blood draw at 6 m of age | 5 until blood draw at 6 m of age | ±               |

|                      |      |           |     |                                                   |         |          |        |                            |                      |                                  |                                  |        |
|----------------------|------|-----------|-----|---------------------------------------------------|---------|----------|--------|----------------------------|----------------------|----------------------------------|----------------------------------|--------|
| Carter [24]          | 2018 | Tanzania  | 291 | Healthy infants                                   | 5-7 wk  | 19-21wks | Daily  | Zn + MV (no Fe) supplement | Sulfate              | 5 until blood draw at 6 m of age | 5 until blood draw at 6 m of age | ±      |
| Caulfield [6]        | 2013 | Peru      | 170 | Healthy infants                                   | 4-6 m   | 18       | Daily  | Zn + Fe + Cu supplement    | Sulfate              | 10                               | 10                               | ±      |
| De Brito [18]        | 2014 | Brazil    | 30  | Healthy children                                  | 8-9 y   | 3        | Daily  | Zn added to milk or juice  | Sulfate              | 10                               | 10                               | ±      |
| Dijkhuizen [25]      | 2001 | Indonesia | 184 | Healthy infants                                   | 4 m     | 6        | 5 d/wk | Zn supplement              | Sulfate              | 10                               | 7.1                              | ±      |
| Dijkhuizen [25]      | 2001 | Indonesia | 164 | Healthy infants                                   | 4 m     | 6        | 5 d/wk | Zn + Fe supplement         | Sulfate              | 10                               | 7.1                              | ↓ [±]* |
| Fahmida [26]         | 2007 | Indonesia | 58  | Anemic infants (80% anemia)                       | 3-6 m   | 6        | Daily  | Zn supplement              | Sulfate              | 10                               | 10                               | ↓ [±]* |
| Heinig [8]           | 2006 | USA       | 19  | Healthy infants                                   | 4 m     | 6        | Daily  | Zn supplement              | Gluconate or Sulfate | 5                                | 5                                | ±      |
| Lind [9]             | 2003 | Indonesia | 277 | Healthy infants                                   | 6 m     | 6        | Daily  | Zn supplement              | Sulfate              | 10                               | 10                               | ±      |
| Lind [9]             | 2003 | Indonesia | 272 | Healthy infants                                   | 6 m     | 6        | Daily  | Zn + Fe supplement         | Sulfate              | 10                               | 10                               | ↓      |
| Lopez de Romaña [27] | 2005 | Peru      | 22  | Stunted and anemic children                       | 3-4 y   | 1.6      | 5d/wk  | Zn + Fe fortified wheat    | Sulfate              | 3                                | 2.1                              | ±      |
| Lopez de Romaña [27] | 2005 | Peru      | 24  | Stunted and anemic children                       | 3-4 y   | 1.6      | 5d/wk  | Zn + Fe fortified wheat    | Sulfate              | 9                                | 6.4                              | ±      |
| Rosado [11]          | 2006 | Mexico    | 187 | Healthy children with environmental lead exposure | 6-7 y   | 6        | 5d/wk  | Zn supplement              | Oxide                | 30                               | 21.4                             | ±      |
| Rosado [11]          | 2006 | Mexico    | 198 | Healthy children with environmental lead exposure | 6-7 y   | 6        | 5d/wk  | Fe + Zn supplement         | Oxide                | 30                               | 21.4                             | ±      |
| Rosado [28]          | 1997 | Mexico    | 95  | Healthy children                                  | 18-36 m | 12       | 5d/wk  | Zn supplement              | Methionine           | 20                               | 14.3                             | ±      |
| Rosado [28]          | 1997 | Mexico    | 99  | Healthy children                                  | 18-36 m | 12       | 5d/wk  | Fe + Zn supplement         | Methionine           | 20                               | 14.3                             | ±      |

|                  |      |           |     |                                                |         |     |       |                             |           |                                      |                                      |        |
|------------------|------|-----------|-----|------------------------------------------------|---------|-----|-------|-----------------------------|-----------|--------------------------------------|--------------------------------------|--------|
| Ruz [12]         | 1997 | Chile     | 68  | Healthy children                               | 27-50 m | 6   | Daily | Intervention; Zn supplement | Sulfate   | 10                                   | 10                                   | ±      |
| Soofi [29]       | 2013 | Pakistan  | 317 | Healthy infants                                | 6 m     | 12  | Daily | Zn + Fe + MNP supplement    | Gluconate | 10                                   | 10                                   | ±      |
| Tielsch [30]     | 2006 | Nepal     | 310 | Healthy infants and children                   | 1-35 m  | 12  | Daily | Zn + Fe + FA supplement     | Sulfate   | 5 for 1-11 m-old, 10 for 12-35 m-old | 5 for 1-11 m-old, 10 for 12-35 m-old | ↓      |
| Veenemans [31]   | 2011 | Tanzania  | 299 | Healthy infants and children                   | 6-60 m  | 8.3 | Daily | Zn supplement               | Gluconate | 10                                   | 10                                   | ↓      |
| Veenemans [31]   | 2011 | Tanzania  | 299 | Healthy infants and children                   | 6-60 m  | 8.3 | Daily | Zn + Fe + MMN supplement    | Gluconate | 10                                   | 10                                   | ↓      |
| Wasantwisut [32] | 2006 | Thailand  | 256 | Healthy infants, Hb 80+ g/L                    | 4-6 m   | 6   | Daily | Zn + VitC supplement        | Sulfate   | 10                                   | 10                                   | ±      |
| Wasantwisut [32] | 2006 | Thailand  | 256 | Healthy infants, Hb 80+ g/L                    | 4-6 m   | 6   | Daily | Zn + Fe + VitC supplement   | Sulfate   | 10                                   | 10                                   | ↓      |
| Wieringa [33]    | 2003 | Indonesia | 91  | Healthy infants                                | 4 m     | 6   | 5d/wk | Zn supplement               | Sulfate   | 10                                   | 7.1                                  | ↓ [±]* |
| Wieringa [33]    | 2003 | Indonesia | 77  | Healthy infants                                | 4 m     | 6   | 5d/wk | Zn + β-carotene supplement  | Sulfate   | 10                                   | 7.1                                  | ±      |
| Wieringa [33]    | 2003 | Indonesia | 88  | Healthy infants                                | 4 m     | 6   | 5d/wk | Zn + Fe supplement          | Sulfate   | 10                                   | 7.1                                  | ±      |
| Wuehler [17]     | 2008 | Ecuador   | 110 | Healthy children                               | 12-30 m | 6   | Daily | Zn supplement               | Sulfate   | 10                                   | 10                                   | ±      |
| Zlotkin [34]     | 2003 | Ghana     | 202 | Infants and children with mild-moderate anemia | 6-18 m  | 2   | Daily | Zn + Fe + VitC supplement   | Gluconate | 10                                   | 10                                   | ±      |

\*In brackets is the effect as reported by the original study. ↑ or ↓ indicates the final concentration is higher or lower, respectively, in the zinc intervention group compared to the non-zinc comparison; ± indicates no reported difference between zinc and no-zinc interventions.

<sup>1</sup> All control groups received the same as the intervention except the dose of zinc listed



**Table S5. Studies and comparisons with reported hemoglobin outcomes in response to additional zinc supplementation or fortification, by author.**

| Study                          | Year | Country      | Sample size analyzed | Characteristics of subjects                            | Initial age | Duration, m | Schedule         | Intervention (All controls are same without the added zinc) | Form of zinc | Dose <sup>1</sup> , mg     | Actual dose <sup>1</sup> , mg/d | Effect of zinc§ |
|--------------------------------|------|--------------|----------------------|--------------------------------------------------------|-------------|-------------|------------------|-------------------------------------------------------------|--------------|----------------------------|---------------------------------|-----------------|
| Alarcon [21]                   | 2004 | Peru         | 213                  | Anemic infants and children (70-100, moderate anaemia) | 6-35m       | 4.1 (18wks) | 6d/wk            | Fe + Zn supplement                                          | Sulfate      | 0.7mg/kg/d                 | 6.5                             | ↑               |
| Baqui [1]                      | 2005 | Bangladesh   | 124                  | Healthy infants                                        | 6 m         | 6           | Weekly           | Zn+ B <sub>2</sub> supplement                               | Acetate      | 20                         | 2.9                             | ±               |
| Baqui [1]                      | 2005 | Bangladesh   | 125                  | Healthy infants                                        | 6 m         | 6           | Weekly           | Zn + Fe + B <sub>2</sub> supplement                         | Acetate      | 20                         | 2.9                             | ±               |
| Becquey [22] data from authors | 2016 | Burkina Faso | 169                  | Healthy infants and children                           | 6-27 m      | 11          | 10 d every 16 wk | Zn supplement                                               | Sulfate      | 7                          | 0.9                             | ±               |
| Becquey [22] data from authors | 2016 | Burkina Faso | 165                  | Healthy infants and children                           | 6-27 m      | 11          | Daily            | Zn supplement                                               | Sulfate      | 7                          | 7                               | ±               |
| Berger [23]                    | 2006 | Vietnam      | 381                  | Healthy infants                                        | 4-7 m       | 6           | Daily            | Zn supplement                                               | Sulfate      | 10                         | 10                              | ±               |
| Berger [23]                    | 2006 | Vietnam      | 379                  | Healthy infants                                        | 4-7 m       | 6           | Daily            | Zn + Fe supplement                                          | Sulfate      | 10                         | 10                              | ±               |
| Brooks [4]                     | 2005 | Bangladesh   | 636                  | Healthy infants                                        | 1-12 m      | 10          | Weekly           | Zn supplement                                               | Acetate      | 70                         | 10                              | ±               |
| Brown [5]                      | 2007 | Peru         | 144                  | Healthy infants                                        | 6-8 m       | 6           | Daily            | Zn supplement + Fe fortified porridge                       | Sulfate      | 3                          | 2.3                             | ±               |
| Brown [5]                      | 2007 | Peru         | 147                  | Healthy infants                                        | 6-8 m       | 6           | Daily            | Zn + Fe fortified complementary food                        | Sulfate      | 3                          | »3.3                            | ±               |
| Carter [24]                    | 2018 | Tanzania     | 302                  | Healthy infants                                        | 5-7 wk      | 18          | Daily            | Zn supplement                                               | Sulfate      | 5 until 6 m of age then 10 | 5 until 6 m of age then 10      | ±               |
| Carter [24]                    | 2018 | Tanzania     | 291                  | Healthy infants                                        | 5-7 wk      | 18          | Daily            | Zn + MV (no Fe) supplement                                  | Sulfate      | 5 until 6 m of age then 10 | 5 until 6 m of age then 10      | ±               |
| Caulfield [6]                  | 2013 | Peru         | 209                  | Healthy infants                                        | 4-6 m       | 18          | Daily            | Zn + Fe + Cu supplement                                     | Sulfate      | 10                         | 10                              | ± [↑]*          |
| De Brito [18]                  | 2014 | Brazil       | 30                   | Healthy children                                       | 8-9 y       | 3           | Daily            | Zn added to milk or juice                                   | Sulfate      | 10                         | 10                              | ±               |
| Dijkhuizen [25]                | 2001 | Indonesia    | 184                  | Healthy infants                                        | 4 m         | 6           | 5 d/wk           | Zn supplement                                               | Sulfate      | 10                         | 7.1                             | ±               |
| Dijkhuizen [25]                | 2001 | Indonesia    | 164                  | Healthy infants                                        | 4 m         | 6           | 5 d/wk           | Zn + Fe supplement                                          | Sulfate      | 10                         | 7.1                             | ↓               |

|                      |      |              |     |                                                          |           |     |       |                                     |                                   |    |     |        |
|----------------------|------|--------------|-----|----------------------------------------------------------|-----------|-----|-------|-------------------------------------|-----------------------------------|----|-----|--------|
| Fahmida [26]         | 2007 | Indonesia    | 303 | Anemic infants (80% anemia)                              | 3-6 m     | 6   | Daily | Zn supplement                       | Sulfate                           | 10 | 10  | ±      |
| Heinig [8]           | 2006 | USA          | 19  | Healthy infants                                          | 4 m       | 6   | Daily | Zn supplement                       | Gluconate or Sulfate              | 5  | 5   | ±      |
| Hess [35]            | 2015 | Burkina Faso | 970 | Healthy infants                                          | 9 m       | 9   | Daily | Zn supplement                       | Not specified, but likely sulfate | 5  | 5   | ±      |
| Hess [35]            | 2015 | Burkina Faso | 987 | Healthy infants                                          | 9 m       | 9   | Daily | Zn + Fe SQ-LNS + placebo supplement | Not specified, but likely sulfate | 5  | 5   | ±      |
| Hess [35]            | 2015 | Burkina Faso | 978 | Healthy infants                                          | 9 m       | 9   | Daily | Zn + Fe SQ-LNS + placebo supplement | Not specified, but likely sulfate | 10 | 10  | ±      |
| Lind [9]             | 2003 | Indonesia    | 277 | Healthy infants                                          | 6 m       | 6   | Daily | Zn supplement                       | Sulfate                           | 10 | 10  | ±      |
| Lind [9]             | 2003 | Indonesia    | 272 | Healthy infants                                          | 6 m       | 6   | Daily | Zn + Fe supplement                  | Sulfate                           | 10 | 10  | ↓      |
| Lopez de Romaña [27] | 2005 | Peru         | 22  | Stunted and anemic children                              | 3-4 y     | 1.6 | 5d/wk | Zn + Fe fortified wheat             | Sulfate                           | 3  | 2.1 | ±      |
| Lopez de Romaña [27] | 2005 | Peru         | 24  | Stunted and anemic children                              | 3-4 y     | 1.6 | 5d/wk | Zn + Fe fortified wheat             | Sulfate                           | 9  | 6.4 | ↓ [±]* |
| Olney [36]           | 2006 | Zanzibar     | 102 | Nutritionally at-risk infants                            | 9.0 m     | 12  | Daily | Zn supplement                       | Not specified, but likely sulfate | 10 | 10  | ↑      |
| Olney [36]           | 2006 | Zanzibar     | 110 | Nutritionally at-risk infants                            | 8.6-8.7 m | 12  | Daily | Zn + Fe + FA supplement             | Not specified, but likely sulfate | 10 | 10  | ±      |
| Owusu-Agyei [37]     | 2013 | Ghana        | 182 | Healthy infants and children                             | 6-24 m    | 6   | Daily | Zn supplement (+ 1 dose VitA)       | Gluconate                         | 10 | 10  | [±]    |
| Penny [38]           | 2004 | Peru         | 134 | Infants and children recovering from persistent diarrhea | 6-36 m    | 6   | Daily | Zn supplement                       | Gluconate                         | 10 | 10  | ±      |

|                   |      |                  |      |                                                   |             |                    |        |                                                                     |               |                               |      |   |
|-------------------|------|------------------|------|---------------------------------------------------|-------------|--------------------|--------|---------------------------------------------------------------------|---------------|-------------------------------|------|---|
| Radhakrishna [10] | 2013 | India            | 68   | Healthy infants                                   | 4 m         | 14 (12 with suppl) | Daily  | Zn+B2 supplement                                                    | Sulfate       | 5                             | 5    | ± |
| Richard [39]      | 2006 | Peru             | 418  | Healthy infants and children                      | 6 m to 15 y | 7                  | 6d/wk  | Zn supplement                                                       | Sulfate       | 20                            | 17.1 | ± |
| Richard [39]      | 2006 | Peru             | 418  | Healthy infants and children                      | 6 m to 15 y | 7                  | 6d/wk  | Fe + Zn supplement                                                  | Sulfate       | 20                            | 17.1 | ± |
| Rosado [11]       | 2006 | Mexico           | 187  | Healthy children with environmental lead exposure | 6-7 y       | 6                  | 5d/wk  | Zn supplement                                                       | Oxide         | 30                            | 21.4 | ± |
| Rosado [11]       | 2006 | Mexico           | 198  | Healthy children with environmental lead exposure | 6-7 y       | 6                  | 5d/wk  | Fe + Zn supplement                                                  | Oxide         | 30                            | 21.4 | ± |
| Rosado [28]       | 1997 | Mexico           | 95   | Healthy children                                  | 18-36 m     | 12                 | 5d/wk  | Zn supplement                                                       | Methionine    | 20                            | 14.3 | ± |
| Rosado [28]       | 1997 | Mexico           | 99   | Healthy children                                  | 18-36 m     | 12                 | 5d/wk  | Fe + Zn supplement                                                  | Methionine    | 20                            | 14.3 | ± |
| Ruz [12]          | 1997 | Chile            | 74   | Healthy children                                  | 27-50 m     | 6 biochem          | Daily  | Intervention; Zn supplement                                         | Sulfate       | 10                            | 10   | ± |
| Sazawal [13]      | 2004 | India            | 115  | Healthy infants                                   | 5-12 m      | 4                  | Daily  | Zn supplement + multi-vitamins (no zinc)                            | Gluconate     | 10                            | 10   | ± |
| Sazawal [40]      | 2018 | India            | 6005 | Healthy children                                  | 4-6 y       | 6                  | Daily  | High Zn biofortified wheat (control is low zinc biofortified wheat) | Not specified | 1.2 diff from lo zinc control | »1.2 | ± |
| Shankar [41]      | 2000 | Papua New Guinea | 212  | Infants and children in malaria endemic area      | 6-60 m      | 10.6               | 6d/wk  | Zn supplement                                                       | Gluconate     | 10                            | 8.6  | ± |
| Smith [42]        | 1999 | El Salvador      | 37   | Children with low serum Zn and low VitA           | 28-70 m     | 6                  | Weekly | Zn supplement                                                       | Gluconate     | Intervention:70               | 10   | ± |
| Smith [42]        | 1999 | El Salvador      | 37   | Children with low serum Zn and low VitA           | 28-70 m     | 6                  | Weekly | Zn + VitA supplement                                                | Gluconate     | Intervention:70               | 10   | ± |
| Soofi [29]        | 2013 | Pakistan         | 411  | Healthy infants                                   | 6 m         | 12                 | Daily  | Zn + Fe + MNP supplement                                            | Gluconate     | 10                            | 10   | ± |

|                  |      |           |     |                                                |         |     |       |                             |           |                                      |                                      |       |
|------------------|------|-----------|-----|------------------------------------------------|---------|-----|-------|-----------------------------|-----------|--------------------------------------|--------------------------------------|-------|
| Taneja [43]      | 2009 | India     | 319 | Healthy infants                                | 0.5 m   | 9   | Daily | Zn + Fe + MN supplement     | Sulfate   | 5 for 3-5 m-old, 10 for 6-12 m-old   | 5 for 3-5 m-old, 10 for 6-12 m-old   | ±     |
| Tielsch [30]     | 2006 | Nepal     | 335 | Healthy infants and children                   | 1-35 m  | 12  | Daily | Zn + Fe + FA supplement     | Sulfate   | 5 for 1-11 m-old, 10 for 12-35 m-old | 5 for 1-11 m-old, 10 for 12-35 m-old | ±     |
| Veenemans [31]   | 2011 | Tanzania  | 299 | Healthy infants and children                   | 6-60 m  | 8.3 | Daily | Zn supplement               | Gluconate | 10                                   | 10                                   | ±     |
| Veenemans [31]   | 2011 | Tanzania  | 299 | Healthy infants and children                   | 6-60 m  | 8.3 | Daily | Zn + MMN with Fe supplement | Gluconate | 10                                   | 10                                   | ±     |
| Wasantwisut [32] | 2006 | Thailand  | 124 | Healthy infants, Hb 80+ g/L                    | 4-6 m   | 6   | Daily | Zn + VitC supplement        | Sulfate   | 10                                   | 10                                   | ↓ [±] |
| Wasantwisut [32] | 2006 | Thailand  | 132 | Healthy infants, Hb 80+ g/L                    | 4-6 m   | 6   | Daily | Zn + Fe + VitC supplement   | Sulfate   | 10                                   | 10                                   | ↓ [±] |
| Wieringa [33]    | 2003 | Indonesia | 91  | Healthy infants                                | 4 m     | 6   | 5d/wk | Zn supplement               | Sulfate   | 10                                   | 7.1                                  | ±     |
| Wieringa [33]    | 2003 | Indonesia | 77  | Healthy infants                                | 4 m     | 6   | 5d/wk | Zn + β-carotene supplement  | Sulfate   | 10                                   | 7.1                                  | ±     |
| Wieringa [33]    | 2003 | Indonesia | 88  | Healthy infants                                | 4 m     | 6   | 5d/wk | Zn + Fe supplement          | Sulfate   | 10                                   | 7.1                                  | ±     |
| Wuehler [17]     | 2008 | Ecuador   | 106 | Healthy children                               | 12-30 m | 6   | Daily | Zn supplement               | Sulfate   | 3                                    | 3                                    | ±     |
| Wuehler [17]     | 2008 | Ecuador   | 108 | Healthy children                               | 12-30 m | 6   | Daily | Zn supplement               | Sulfate   | 7                                    | 7                                    | ±     |
| Wuehler [17]     | 2008 | Ecuador   | 110 | Healthy children                               | 12-30 m | 6   | Daily | Zn supplement               | Sulfate   | 10                                   | 10                                   | ±     |
| Zlotkin [34]     | 2003 | Ghana     | 239 | Infants and children with mild-moderate anemia | 6-18 m  | 2   | Daily | Zn + Fe + VitC supplement   | Gluconate | 10                                   | 10                                   | ↓     |

\*In brackets is the effect as reported by the original study. ↑ or ↓ indicates the final concentration is higher or lower, respectively, in the zinc intervention group compared to the non-zinc comparison; ± indicates no reported difference between zinc and no-zinc interventions.

<sup>1</sup> All control groups received the same as the intervention except the dose of zinc listed

**Table S6. Studies and comparisons with reported serum transferrin receptor outcomes in response to additional zinc supplementation or fortification, by author.**

| Study                          | Year | Country      | Sample size analyzed | Characteristics of subjects  | Initial age | Duration, m | Schedule         | Intervention (All controls are same without the added zinc) | Form of zinc | Dose <sup>1</sup> , mg     | Actual dose <sup>1</sup> , mg/d | Effect of zinc§ |
|--------------------------------|------|--------------|----------------------|------------------------------|-------------|-------------|------------------|-------------------------------------------------------------|--------------|----------------------------|---------------------------------|-----------------|
| Baqui [1]                      | 2005 | Bangladesh   | 80                   | Healthy infants              | 6 m         | 6           | Weekly           | Zn + B <sub>2</sub> supplement                              | Acetate      | 20                         | 2.9                             | ±               |
| Baqui [1]                      | 2005 | Bangladesh   | 83                   | Healthy infants              | 6 m         | 6           | Weekly           | Zn + Fe + B <sub>2</sub> supplement                         | Acetate      | 20                         | 2.9                             | ±               |
| Becquey [22] data from authors | 2016 | Burkina Faso | 165                  | Healthy infants and children | 6-27 m      | 11          | Daily            | Zn supplement                                               | Sulfate      | 7                          | 7                               | ±               |
| Becquey [22] data from authors | 2016 | Burkina Faso | 169                  | Healthy infants and children | 6-27 m      | 11          | 10 d every 16 wk | Zn supplement                                               | Sulfate      | 1.4                        | 0.9                             | ±               |
| Carter [24]                    | 2018 | Tanzania     | 302                  | Healthy infants              | 5-7 wk      | 6 (18)      | Daily            | Zn supplement                                               | Sulfate      | 5 until 6 m of age then 10 | 5 until 6 m of age then 10      | ±               |
| Carter [24]                    | 2018 | Tanzania     | 291                  | Healthy infants              | 5-7 wk      | 18          | Daily            | Zn + MV (no Fe) supplement                                  | Sulfate      | 5 until 6 m of age then 10 | 5 until 6 m of age then 10      | ±               |
| Lind [9]                       | 2003 | Indonesia    | 257                  | Healthy infants              | 6 m         | 6           | Daily            | Zn supplement                                               | Sulfate      | 10                         | 10                              | ±               |
| Lind [9]                       | 2003 | Indonesia    | 250                  | Healthy infants              | 6 m         | 6           | Daily            | Zn + Fe supplement                                          | Sulfate      | 10                         | 10                              | ±               |

\*In brackets is the effect as reported by the original study. ↑ or ↓ indicates the final concentration is higher or lower, respectively, in the zinc intervention group compared to the non-zinc comparison; ± indicates no reported difference between zinc and no-zinc interventions.

<sup>1</sup> All control groups received the same as the intervention except the dose of zinc listed

**Table S7. Studies and comparisons with reported lipid outcomes in response to additional zinc supplementation or fortification, by author.**

| Study          | Year | Country | Sample size analyzed | Characteristics of subjects | Initial age | Duration, m | Schedule | Intervention (All controls are same without the added zinc) | Form of zinc | Dose <sup>1</sup> , mg | Actual dose <sup>1</sup> , mg/d | Effect of zinc§     |
|----------------|------|---------|----------------------|-----------------------------|-------------|-------------|----------|-------------------------------------------------------------|--------------|------------------------|---------------------------------|---------------------|
| Chimhashu [44] | 2018 | Benin   | 162                  | Healthy children            | 6-10 y      | 4.6         | 5 d/wk   | Zn fortified water                                          | Zinc ions    | 4.3                    | 2.8                             | nervonic acid       |
| Hambidge [7]   | 1979 | USA     | 58                   | Healthy children            | 33-90 m     | 9           | Daily    | Zn fortified breakfast cereal (control, no fortificant)     | Oxide        | 9.3                    | 3                               | ± serum cholesterol |
| Walravens [15] | 1976 | USA     | 68                   | Healthy infants             | 4-6 d       | 6           | Daily    | Zn + Fe fortified formula                                   | Sulfate      | 5.8                    | 4                               | ± serum cholesterol |
| Wuehler [17]   | 2008 | Ecuador | 110                  | Healthy children            | 12-30 m     | 6           | Daily    | Zn supplement                                               | Sulfate      | 10                     | 10                              | ± serum cholesterol |

\*In brackets is the effect as reported by the original study. ↑ or ↓ indicates the final concentration is higher or lower, respectively, in the zinc intervention group compared to the non-zinc comparison; ± indicates no reported difference between zinc and no-zinc interventions.

<sup>1</sup> All control groups received the same as the intervention except the dose of zinc listed

## Supplementary Figures

**Figure S1: Effect of additional zinc intervention on plasma or serum ceruloplasmin concentrations.**

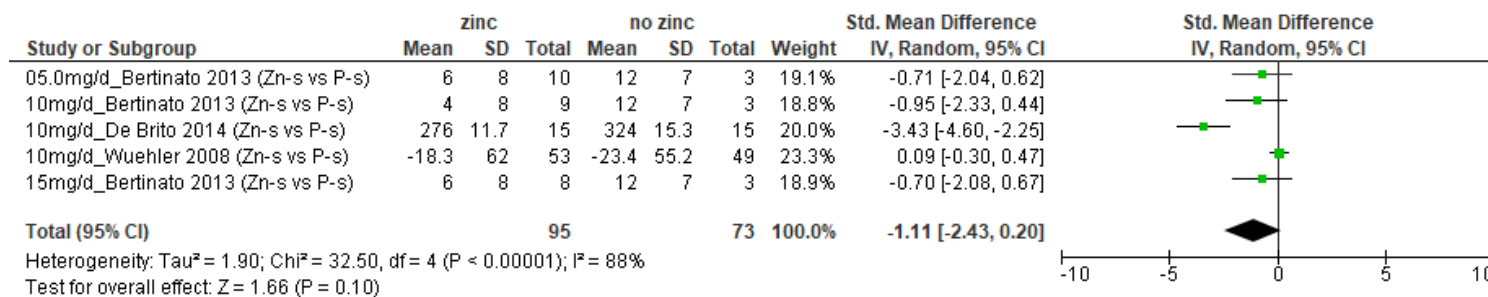

**Figure S1 legends:** Zn-s: Zinc supplement; P-s: Placebo supplement

**Figure S2: Effect of additional zinc intervention on erythrocyte super-oxide dismutase concentrations.**

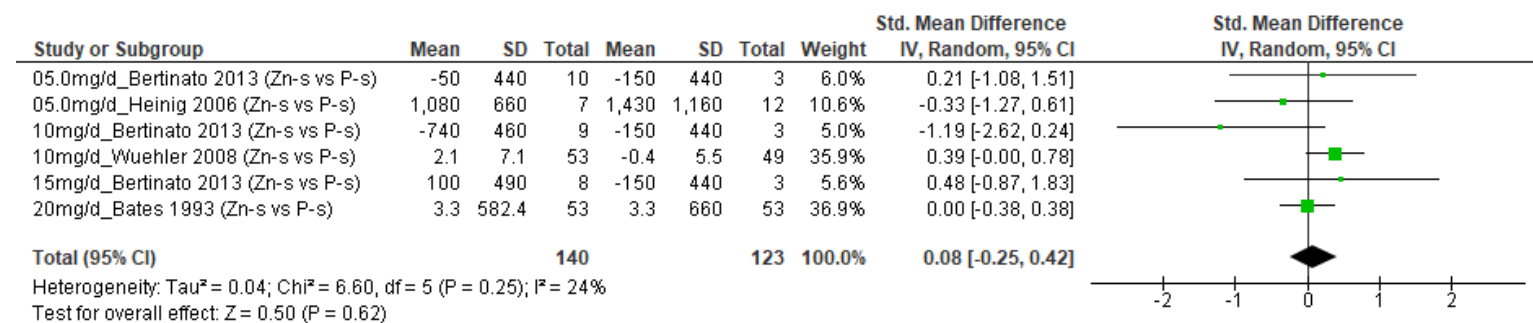

**Figure S2 legends:** Zn-s: Zinc supplement; P-s: Placebo supplement



**Figure S3: Effect of additional zinc intervention (no iron was provided either in the intervention or control group) on serum ferritin concentrations (a) < 12 months, (b) 12 months or more.**

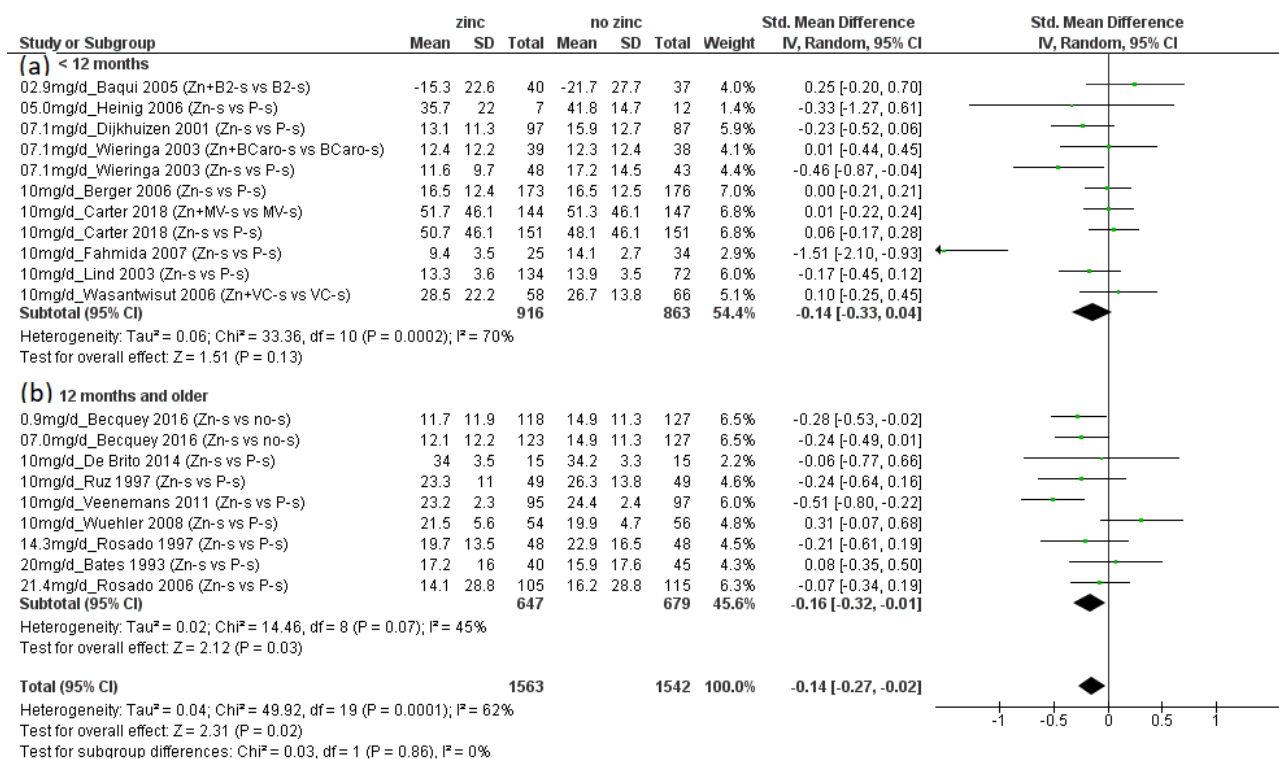

**Figure S3 legends:** Zn-s: Zinc supplement; Zn + B2-s: Zinc plus vitamin B12 supplement; B2-s: Vitamin B2 supplement; P-s: Placebo supplement; no-s: No supplement; Zn + BCaro-s: zinc plus beta carotene supplement; BCaro-s: Beta carotene supplement; Zn + MV-s: Zinc plus multivitamin supplement; MV-s: Multivitamin supplement; Zn + VC-s: Zinc plus vitamin C supplement; VC-s: Vitamin C supplement. NOTE: Placebo value (P) from Lind et al 2003 updated by Dr. Lind through personal communication.

**Figure S4: Effect of additional zinc intervention (iron was provided in both the intervention and control group) on serum ferritin concentrations (a) < 12 months, (b) 12 months or more.**

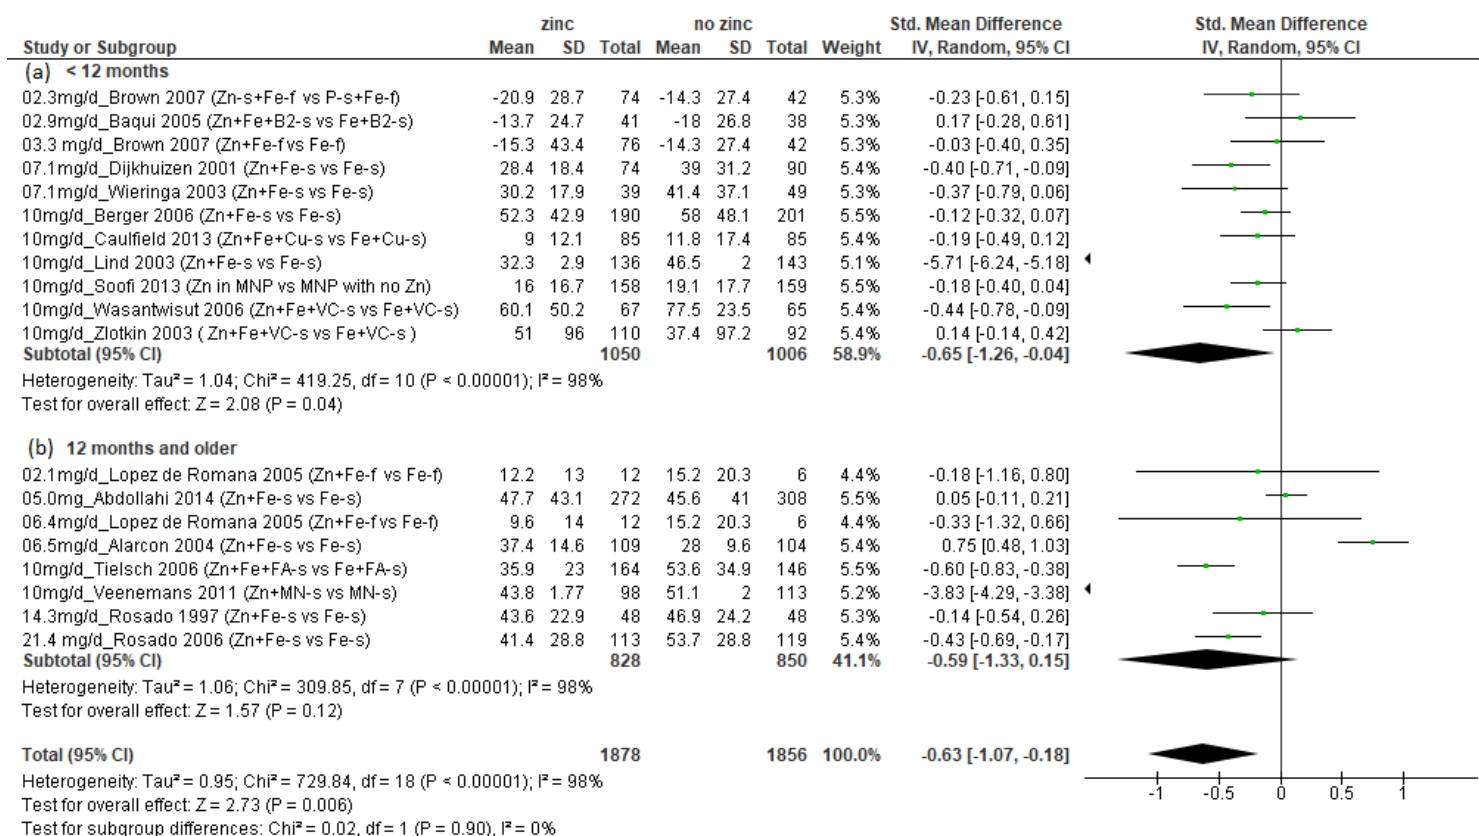

**Figure S4 legends:** Zn+Fe-s: Zinc plus iron supplement; Zn + Fe + Cu-s: Zinc plus iron plus copper supplement; Fe + Cu-s: Iron plus copper supplement; Zn+Fe+B2-s: Zinc plus iron plus vitamin B2 supplement; Fe-f: Iron fortified; Fe-s: Iron supplement; Zn + Fe-f: Zinc plus iron fortified; Fe-f: Iron fortified; Zn-s+Fe-f: Zinc supplement plus iron fortified; P-s+Fe-f: Placebo supplement plus iron fortified; Zn+Fe+FA-s: Zinc plus iron plus folic acid supplement; Fe+FA-s: Iron plus folic acid supplement; Zn in MNP: Micronutrient powder with zinc plus iron; MNP with no Zn: Micronutrient powder with no zinc plus iron; Zn + MN: Zinc plus micronutrient supplement; Zn + Fe + VC-s: Zinc plus iron plus vitamin C supplement.

**Figure S5: Effect of additional zinc intervention on whole blood hemoglobin concentrations, by mean age at baseline: (a) <12 months, (b) 12 months or older.**

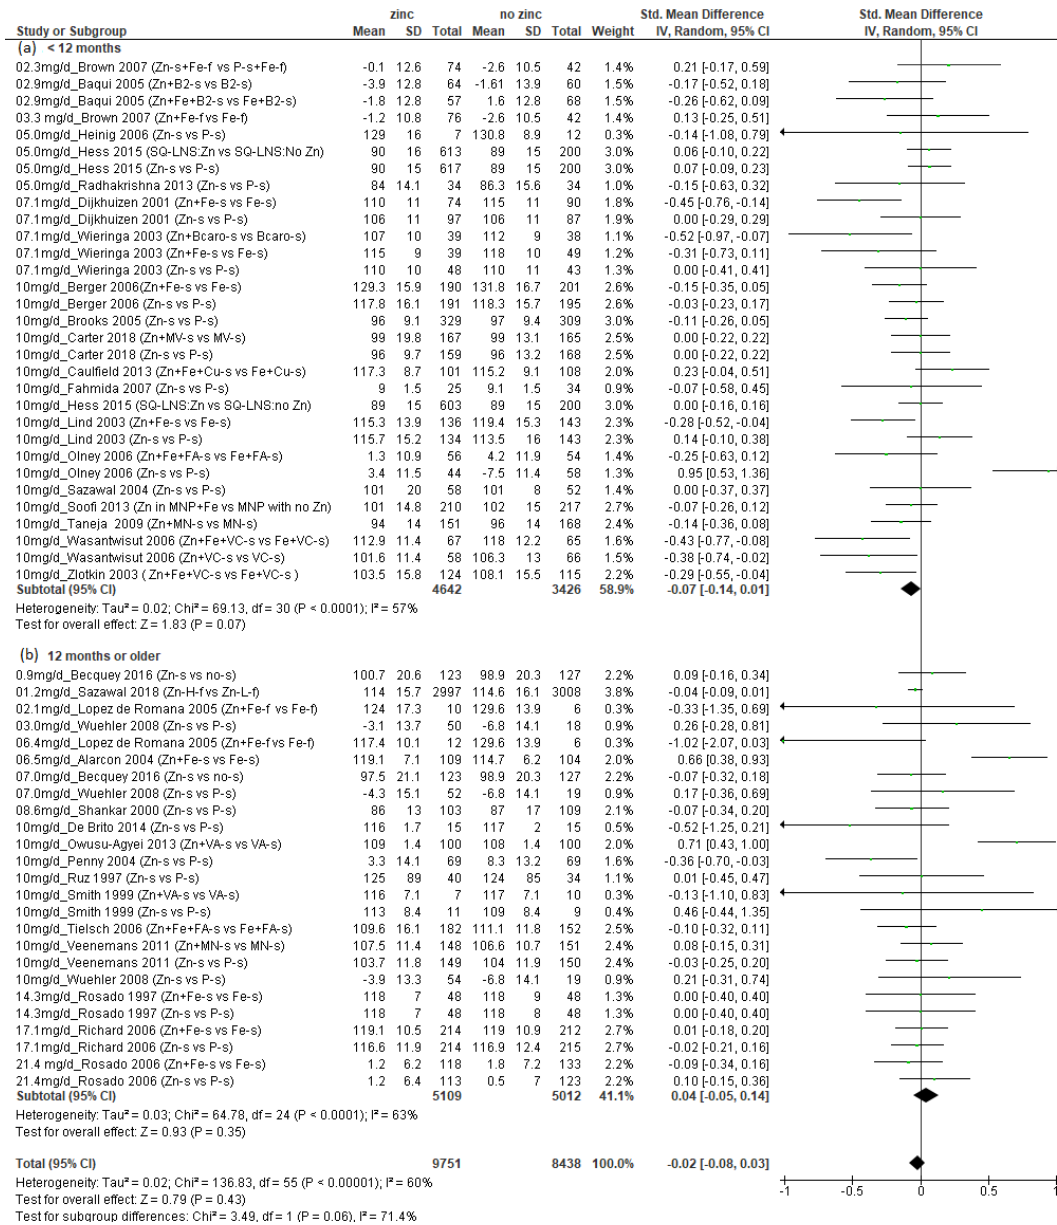

**Figure S5 legends:** Zn-s: Zinc supplement; Zn+ Fe-s: Zinc plus iron supplement; Zn + Fe + Cu-s: Zinc plus iron plus copper supplement; Fe + Cu-s: Iron plus copper supplement; Zn + B2-s: Zinc plus vitamin B12 supplement; B2-s: Vitamin B2 supplement; Zn+Fe+B2-s: Zinc plus iron plus vitamin B2 supplement; Zn-f: Zinc fortified; P-s: Placebo supplement; P-f: Placebo fortified; Fe-f: Iron fortified; Fe-s: Iron supplement; Zn-H-Dose-f: Zinc high dose fortified; Zn-L-Dose-f: Zinc low dose fortified; Zn-H-f: Zinc high fortified; Zn-L-f: Zinc low fortified; no-s: No supplement; Zn + BCaro-s: zinc plus beta carotene supplement ;BCaro-s: Beta carotene supplement; Zn + MV-s: Zinc plus multivitamin supplement; MV-s: Multivitamin supplement; Zn+VA-s: Zinc plus vitamin A supplement; VA-s: Vitamin A supplement; Zn + VC-s: Zinc plus vitamin C supplement ; VC-s: Vitamin C supplement; Zn + Fe-f: Zinc plus iron fortified; Fe-f: Iron fortified; Zn-s+Fe-f: Zinc supplement plus iron fortified; P-s+Fe-f: Placebo supplement plus iron fortified; SQ-LNS:Zn: Small quantity Lipid Nutrient supplement with zinc; SQ-LNS:No Zn: Small quantity Lipid Nutrient supplement with no zinc; Zn+Fe+FA-s: Zinc plus iron plus folic acid supplement; Fe+FA-s: Iron plus folic acid supplement; Zn in MNP: Micronutrient powder with zinc plus iron; MNP with no Zn: Micronutrient powder with no zinc plus iron; Zn + MN: Zinc plus micronutrient supplement; Zn + Fe + VC-s: Zinc plus iron plus vitamin C supplement.

**Figure S6: Effect of additional zinc intervention on serum transferrin receptor concentrations.**

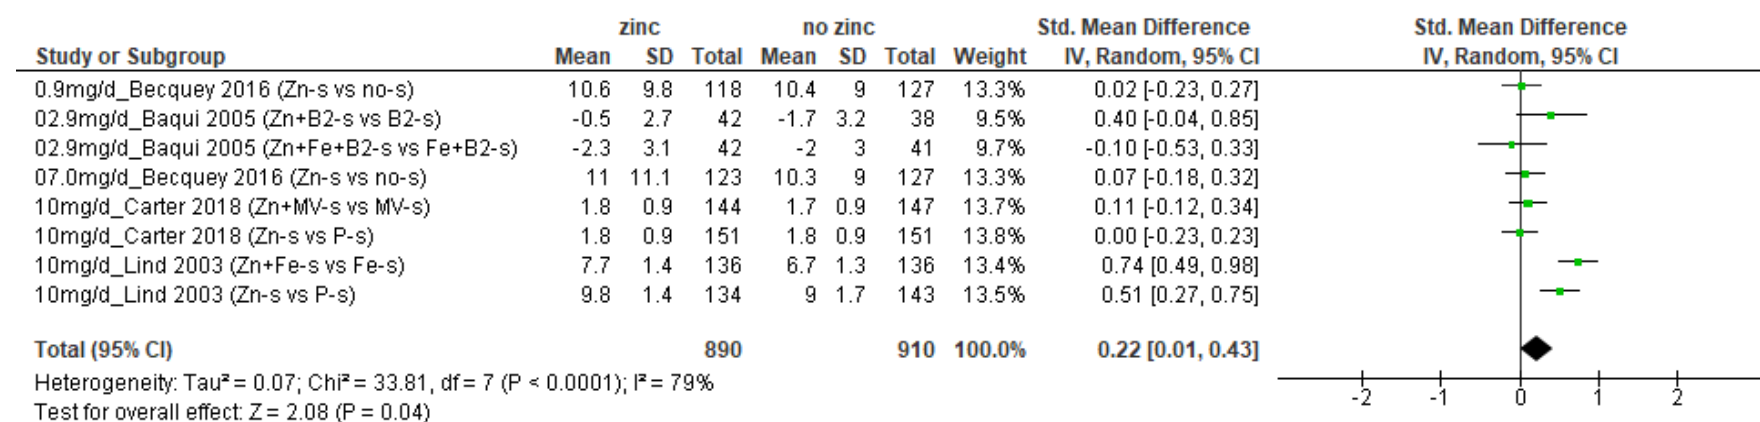

**Figure S6 legends:** Zn-s: Zinc supplement; P-s: Placebo supplement; Zn + B2-s: Zinc plus vitamin B12 supplement; B2-s: Vitamin B2 supplement; no-s: No supplement

## References for studies in supplementary tables

1. Baqui, A.H.; Walker, C.L.; Zaman, K.; El Arifeen, S.; Chowdhury, H.R.; Wahed, M.A.; Black, R.E.; Caulfield, L.E. Weekly iron supplementation does not block increases in serum zinc due to weekly zinc supplementation in Bangladeshi infants. *The Journal of nutrition* **2005**, *135*, 2187-2191, doi:10.1093/jn/135.9.2187.
2. Bertinato, J.; Simpson, J.R.; Sherrard, L.; Taylor, J.; Plouffe, L.J.; Van Dyke, D.; Geleynse, M.; Dam, Y.Y.; Murphy, P.; Knee, C., et al. Zinc supplementation does not alter sensitive biomarkers of copper status in healthy boys. *The Journal of nutrition* **2013**, *143*, 284-289, doi:10.3945/jn.112.171306.
3. Bhandari, N.; Bahl, R.; Taneja, S.; Strand, T.; Molbak, K.; Ulvik, R.J.; Sommerfelt, H.; Bhan, M.K. Substantial reduction in severe diarrheal morbidity by daily zinc supplementation in young north Indian children. *Pediatrics* **2002**, *109*, e86.
4. Brooks, W.A.; Santosham, M.; Naheed, A.; Goswami, D.; Wahed, M.A.; Diener-West, M.; Faruque, A.S.; Black, R.E. Effect of weekly zinc supplements on incidence of pneumonia and diarrhoea in children younger than 2 years in an urban, low-income population in Bangladesh: randomised controlled trial. *Lancet* **2005**, *366*, 999-1004, doi:10.1016/S0140-6736(05)67109-7.
5. Brown, K.H.; Lopez de Romana, D.; Arsenault, J.E.; Peerson, J.M.; Penny, M.E. Comparison of the effects of zinc delivered in a fortified food or a liquid supplement on the growth, morbidity, and plasma zinc concentrations of young Peruvian children. *The American journal of clinical nutrition* **2007**, *85*, 538-547, doi:10.1093/ajcn/85.2.538.
6. Caulfield, L.E.; Zavaleta, N.; Chen, P.; Colombo, J.; Kannass, K. Mineral status of non-anemic Peruvian infants taking an iron and copper syrup with or without zinc from 6 to 18 months of age: a randomized controlled trial. *Nutrition* **2013**, *29*, 1336-1341, doi:10.1016/j.nut.2013.05.023.
7. Hambidge, K.M.; Chavez, M.N.; Brown, R.M.; Walravens, P.A. Zinc nutritional status of young middle-income children and effects of consuming zinc-fortified breakfast cereals. *The American journal of clinical nutrition* **1979**, *32*, 2532-2539, doi:10.1093/ajcn/32.12.2532.
8. Heinig, M.J.; Brown, K.H.; Lonnerdal, B.; Dewey, K.G. Zinc supplementation does not affect growth, morbidity, or motor development of US term breastfed infants at 4-10 mo of age. *The American journal of clinical nutrition* **2006**, *84*, 594-601, doi:10.1093/ajcn/84.3.594.
9. Lind, T.; Lonnerdal, B.; Stenlund, H.; Ismail, D.; Seswandhana, R.; Ekstrom, E.C.; Persson, L.A. A community-based randomized controlled trial of iron and zinc supplementation in Indonesian infants: interactions between iron and zinc. *The American journal of clinical nutrition* **2003**, *77*, 883-890, doi:10.1093/ajcn/77.4.883.
10. Radhakrishna, K.V.; Hemalatha, R.; Geddam, J.J.; Kumar, P.A.; Balakrishna, N.; Shatrugna, V. Effectiveness of zinc supplementation to full term normal infants: a community based double blind, randomized, controlled, clinical trial. *PLoS One* **2013**, *8*, e61486, doi:10.1371/journal.pone.0061486.
11. Rosado, J.L.; Lopez, P.; Kordas, K.; Garcia-Vargas, G.; Ronquillo, D.; Alatorre, J.; Stoltzfus, R.J. Iron and/or zinc supplementation did not reduce blood lead concentrations in children in a randomized, placebo-controlled trial. *The Journal of nutrition* **2006**, *136*, 2378-2383, doi:10.1093/jn/136.9.2378.
12. Ruz, M.; Castillo-Duran, C.; Lara, X.; Codoceo, J.; Rebolledo, A.; Atalah, E. A 14-mo zinc-supplementation trial in apparently healthy Chilean preschool children. *The American journal of clinical nutrition* **1997**, *66*, 1406-1413, doi:10.1093/ajcn/66.6.1406.
13. Sazawal, S.; Malik, P.; Jalla, S.; Krebs, N.; Bhan, M.K.; Black, R.E. Zinc supplementation for four months does not affect plasma copper concentration in infants. *Acta Paediatr* **2004**, *93*, 599-602, doi:10.1111/j.1651-2227.2004.tb18254.x.
14. Tielsch, J.M.; Khatry, S.K.; Stoltzfus, R.J.; Katz, J.; LeClerq, S.C.; Adhikari, R.; Mullany, L.C.; Black, R.; Shrestha, S. Effect of daily zinc supplementation on child mortality in southern Nepal: a community-based, cluster randomised, placebo-controlled trial. *Lancet* **2007**, *370*, 1230-1239, doi:10.1016/S0140-6736(07)61539-6.
15. Walravens, P.A.; Hambidge, K.M. Growth of infants fed a zinc supplemented formula. *The American journal of clinical nutrition* **1976**, *29*, 1114-1121, doi:10.1093/ajcn/29.10.1114.
16. Walravens, P.A.; Krebs, N.F.; Hambidge, K.M. Linear growth of low income preschool children receiving a zinc supplement. *The American journal of clinical nutrition* **1983**, *38*, 195-201, doi:10.1093/ajcn/38.2.195.
17. Wuehler, S.E.; Sempertegui, F.; Brown, K.H. Dose-response trial of prophylactic zinc supplements, with or without copper, in young Ecuadorian children at risk of zinc deficiency. *The American journal of clinical nutrition* **2008**, *87*, 723-733, doi:10.1093/ajcn/87.3.723.

18. de Brito, N.J.; Rocha, E.D.; de Araujo Silva, A.; Costa, J.B.; Franca, M.C.; das Gracias Almeida, M.; Brandao-Neto, J. Oral zinc supplementation decreases the serum iron concentration in healthy schoolchildren: a pilot study. *Nutrients* **2014**, *6*{Chen, 2008 #1387}, 3460-3473, doi:10.3390/nu6093460.
19. Bates, C.J.; Evans, P.H.; Dardenne, M.; Prentice, A.; Lunn, P.G.; Northrop-Clewes, C.A.; Hoare, S.; Cole, T.J.; Horan, S.J.; Longman, S.C., et al. A trial of zinc supplementation in young rural Gambian children. *Br J Nutr* **1993**, *69*, 243-255, doi:10.1079/bjn19930026.
20. Abdollahi, M.; Ajami, M.; Abdollahi, Z.; Kalantari, N.; Houshiarrad, A.; Fozouni, F.; Fallahrokni, A.; Mazandarani, F.S. Zinc supplementation is an effective and feasible strategy to prevent growth retardation in 6 to 24 month children: A pragmatic double blind, randomized trial. *Heliyon* **2019**, *5*, e02581, doi:10.1016/j.heliyon.2019.e02581.
21. Alarcon, K.; Kolsteren, P.W.; Prada, A.M.; Chian, A.M.; Velarde, R.E.; Pecho, I.L.; Hoeree, T.F. Effects of separate delivery of zinc or zinc and vitamin A on hemoglobin response, growth, and diarrhea in young Peruvian children receiving iron therapy for anemia. *The American journal of clinical nutrition* **2004**, *80*, 1276-1282, doi:10.1093/ajcn/80.5.1276.
22. Becquey, E.; Ouedraogo, C.T.; Hess, S.Y.; Rouamba, N.; Prince, L.; Ouedraogo, J.B.; Vosti, S.A.; Brown, K.H. Comparison of Preventive and Therapeutic Zinc Supplementation in Young Children in Burkina Faso: A Cluster-Randomized, Community-Based Trial. *The Journal of nutrition* **2016**, *146*, 2058-2066, doi:10.3945/jn.116.230128.
23. Berger, J.; Ninh, N.X.; Khan, N.C.; Nhien, N.V.; Lien, D.K.; Trung, N.Q.; Khoi, H.H. Efficacy of combined iron and zinc supplementation on micronutrient status and growth in Vietnamese infants. *European journal of clinical nutrition* **2006**, *60*, 443-454, doi:10.1038/sj.ejcn.1602336.
24. Carter, R.C.; Kupka, R.; Manji, K.; McDonald, C.M.; Aboud, S.; Erhardt, J.G.; Gosselin, K.; Kisenge, R.; Liu, E.; Fawzi, W., et al. Zinc and multivitamin supplementation have contrasting effects on infant iron status: a randomized, double-blind, placebo-controlled clinical trial. *European journal of clinical nutrition* **2018**, *72*, 130-135, doi:10.1038/ejcn.2017.138.
25. Dijkhuizen, M.A.; Wieringa, F.T.; West, C.E.; Martuti, S.; Muhilal. Effects of iron and zinc supplementation in Indonesian infants on micronutrient status and growth. *The Journal of nutrition* **2001**, *131*, 2860-2865, doi:10.1093/jn/131.11.2860.
26. Fahmida, U.; Rumawas, J.S.; Utomo, B.; Patmonodewo, S.; Schultink, W. Zinc-iron, but not zinc-alone supplementation, increased linear growth of stunted infants with low haemoglobin. *Asia Pac J Clin Nutr* **2007**, *16*, 301-309.
27. Lopez de Romana, D.; Salazar, M.; Hambidge, K.M.; Penny, M.E.; Peerson, J.M.; Krebs, N.F.; Brown, K.H. Longitudinal measurements of zinc absorption in Peruvian children consuming wheat products fortified with iron only or iron and 1 of 2 amounts of zinc. *The American journal of clinical nutrition* **2005**, *81*, 637-647, doi:10.1093/ajcn/81.3.637.
28. Rosado, J.L.; Lopez, P.; Munoz, E.; Martinez, H.; Allen, L.H. Zinc supplementation reduced morbidity, but neither zinc nor iron supplementation affected growth or body composition of Mexican preschoolers. *The American journal of clinical nutrition* **1997**, *65*, 13-19, doi:10.1093/ajcn/65.1.13.
29. Soofi, S.; Cousens, S.; Iqbal, S.P.; Akhund, T.; Khan, J.; Ahmed, I.; Zaidi, A.K.; Bhutta, Z.A. Effect of provision of daily zinc and iron with several micronutrients on growth and morbidity among young children in Pakistan: a cluster-randomised trial. *Lancet* **2013**, *382*, 29-40, doi:10.1016/S0140-6736(13)60437-7.
30. Tielsch, J.M.; Khatry, S.K.; Stoltzfus, R.J.; Katz, J.; LeClerq, S.C.; Adhikari, R.; Mullany, L.C.; Shrestha, S.; Black, R.E. Effect of routine prophylactic supplementation with iron and folic acid on preschool child mortality in southern Nepal: community-based, cluster-randomised, placebo-controlled trial. *Lancet* **2006**, *367*, 144-152, doi:10.1016/S0140-6736(06)67963-4.
31. Veenemans, J.; Milligan, P.; Prentice, A.M.; Schouten, L.R.; Inja, N.; van der Heijden, A.C.; de Boer, L.C.; Jansen, E.J.; Koopmans, A.E.; Enthoven, W.T., et al. Effect of supplementation with zinc and other micronutrients on malaria in Tanzanian children: a randomised trial. *PLoS Med* **2011**, *8*, e1001125, doi:10.1371/journal.pmed.1001125.
32. Wasantwisut, E.; Winichagoon, P.; Chitchumroonchokchai, C.; Yamborisut, U.; Boonpradern, A.; Pongcharoen, T.; Sranacharoenpong, K.; Russameesopaphorn, W. Iron and zinc supplementation improved iron and zinc status, but not physical growth, of apparently healthy, breast-fed infants in rural communities of northeast Thailand. *The Journal of nutrition* **2006**, *136*, 2405-2411, doi:10.1093/jn/136.9.2405.

33. Wieringa, F.T.; Dijkhuizen, M.A.; West, C.E.; Thurnham, D.I.; Muhilal; Van der Meer, J.W. Redistribution of vitamin A after iron supplementation in Indonesian infants. *The American journal of clinical nutrition* **2003**, *77*, 651-657, doi:10.1093/ajcn/77.3.651.
34. Zlotkin, S.; Arthur, P.; Schauer, C.; Antwi, K.Y.; Yeung, G.; Piekarz, A. Home-fortification with iron and zinc sprinkles or iron sprinkles alone successfully treats anemia in infants and young children. *The Journal of nutrition* **2003**, *133*, 1075-1080, doi:10.1093/jn/133.4.1075.
35. Hess, S.Y.; Abbeddou, S.; Jimenez, E.Y.; Some, J.W.; Vosti, S.A.; Ouedraogo, Z.P.; Guissou, R.M.; Ouedraogo, J.B.; Brown, K.H. Small-quantity lipid-based nutrient supplements, regardless of their zinc content, increase growth and reduce the prevalence of stunting and wasting in young burkinabe children: a cluster-randomized trial. *PLoS One* **2015**, *10*, e0122242, doi:10.1371/journal.pone.0122242.
36. Olney, D.K.; Pollitt, E.; Kariger, P.K.; Khalfan, S.S.; Ali, N.S.; Tielsch, J.M.; Sazawal, S.; Black, R.; Allen, L.H.; Stoltzfus, R.J. Combined iron and folic acid supplementation with or without zinc reduces time to walking unassisted among Zanzibari infants 5- to 11-mo old. *The Journal of nutrition* **2006**, *136*, 2427-2434, doi:10.1093/jn/136.9.2427.
37. Owusu-Agyei, S.; Newton, S.; Mahama, E.; Febir, L.G.; Ali, M.; Adjei, K.; Tchum, K.; Alhassan, L.; Moleah, T.; Tanumihardjo, S.A. Impact of vitamin A with zinc supplementation on malaria morbidity in Ghana. *Nutr J* **2013**, *12*, 131, doi:10.1186/1475-2891-12-131.
38. Penny, M.E.; Marin, R.M.; Duran, A.; Peerson, J.M.; Lanata, C.F.; Lonnerdal, B.; Black, R.E.; Brown, K.H. Randomized controlled trial of the effect of daily supplementation with zinc or multiple micronutrients on the morbidity, growth, and micronutrient status of young Peruvian children. *The American journal of clinical nutrition* **2004**, *79*, 457-465, doi:10.1093/ajcn/79.3.457.
39. Richard, S.A.; Zavaleta, N.; Caulfield, L.E.; Black, R.E.; Witzig, R.S.; Shankar, A.H. Zinc and iron supplementation and malaria, diarrhea, and respiratory infections in children in the Peruvian Amazon. *Am J Trop Med Hyg* **2006**, *75*, 126-132, doi:10.4269/ajtmh.2006.75.1.0750126.
40. Sazawal, S.; Dhingra, U.; Dhingra, P.; Dutta, A.; Deb, S.; Kumar, J.; Devi, P.; Prakash, A. Efficacy of high zinc biofortified wheat in improvement of micronutrient status, and prevention of morbidity among preschool children and women - a double masked, randomized, controlled trial. *Nutr J* **2018**, *17*, 86, doi:10.1186/s12937-018-0391-5.
41. Shankar, A.H.; Genton, B.; Baisor, M.; Paino, J.; Tamja, S.; Adiguma, T.; Wu, L.; Rare, L.; Bannan, D.; Tielsch, J.M., et al. The influence of zinc supplementation on morbidity due to Plasmodium falciparum: a randomized trial in preschool children in Papua New Guinea. *Am J Trop Med Hyg* **2000**, *62*, 663-669, doi:10.4269/ajtmh.2000.62.663.
42. Smith, J.C.; Makdani, D.; Hegar, A.; Rao, D.; Douglass, L.W. Vitamin A and zinc supplementation of preschool children. *J Am Coll Nutr* **1999**, *18*, 213-222, doi:10.1080/07315724.1999.10718854.
43. Taneja, S.; Bhandari, N.; Rongsen-Chandola, T.; Mahalanabis, D.; Fontaine, O.; Bhan, M.K. Effect of zinc supplementation on morbidity and growth in hospital-born, low-birth-weight infants. *The American journal of clinical nutrition* **2009**, *90*, 385-391, doi:10.3945/ajcn.2009.27707.
44. Chimhashu, T.; Malan, L.; Baumgartner, J.; van Jaarsveld, P.J.; Galetti, V.; Moretti, D.; Smuts, C.M.; Zimmermann, M.B. Sensitivity of fatty acid desaturation and elongation to plasma zinc concentration: a randomised controlled trial in Beninese children. *Br J Nutr* **2018**, *119*, 610-619, doi:10.1017/S000711451700366X.
